# Supplementary material
Source: publisher figshare collection journal article supplement (https://acs.figshare.com/ndownloader/files/4211803)
Supplement: Supplementary file 1 [file 4211803]

## *Supporting Information*

# Acremostriatin, a Highly Oxygenated Metabolite from the Marine Fungus *Acremonium strictum*

Elin Julianti<sup>†</sup>, Hana Oh<sup>†</sup>, Kyoung Hwa Jang<sup>†</sup>, Jae Kyun Lee<sup>‡</sup>, Sang Kook Lee<sup>†</sup>,

Dong-Chan Oh<sup>†</sup>, Ki-Bong Oh<sup>§,\*</sup>, and Jongheon Shin<sup>†,\*</sup>

<sup>†</sup> Natural Products Research Institute, College of Pharmacy, Seoul National University, San 56-1, Sillim, Gwanak, Seoul 151-742, Korea, <sup>‡</sup>Center for Chemoinformatics Research, Korea Institute of Science and Technology, P.O. Box 131, Cheongyang, Seoul 130-650, Korea, <sup>§</sup>Department of Agricultural Biotechnology, College of Agriculture & Life Science, Seoul National University, San 56-1, Sillim, Gwanak, Seoul 151-921, Korea

*shinj@snu.ac.kr*

## Contents

|                                                                                                |     |
|------------------------------------------------------------------------------------------------|-----|
| Table of Contents                                                                              | S1  |
| <sup>1</sup> H- NMR (500 MHz, Pyridine- <i>d</i> <sub>5</sub> ) spectrum of compound <b>1</b>  | S3  |
| <sup>13</sup> C- NMR (125 MHz, Pyridine- <i>d</i> <sub>5</sub> ) spectrum of compound <b>1</b> | S4  |
| COSY spectrum of compound <b>1</b>                                                             | S5  |
| HSQC spectrum of compound <b>1</b>                                                             | S6  |
| HMBC spectrum of compound <b>1</b>                                                             | S7  |
| Five possible structures of compound <b>1</b>                                                  | S8  |
| A stereo ORTEP drawing of crystal structure of compound <b>1</b>                               | S8  |
| A packing pattern with H-bonds of crystal structure of compound <b>1</b>                       | S8  |
| Result of antioxidant activity test                                                            | S9  |
| Antioxidant potential of compound <b>1</b> on DPPH free radical scavenging activity            | S10 |

Protective effects of compound **1** on H<sub>2</sub>O<sub>2</sub>-induced cell death of HaCaT human keratinocytes

S10

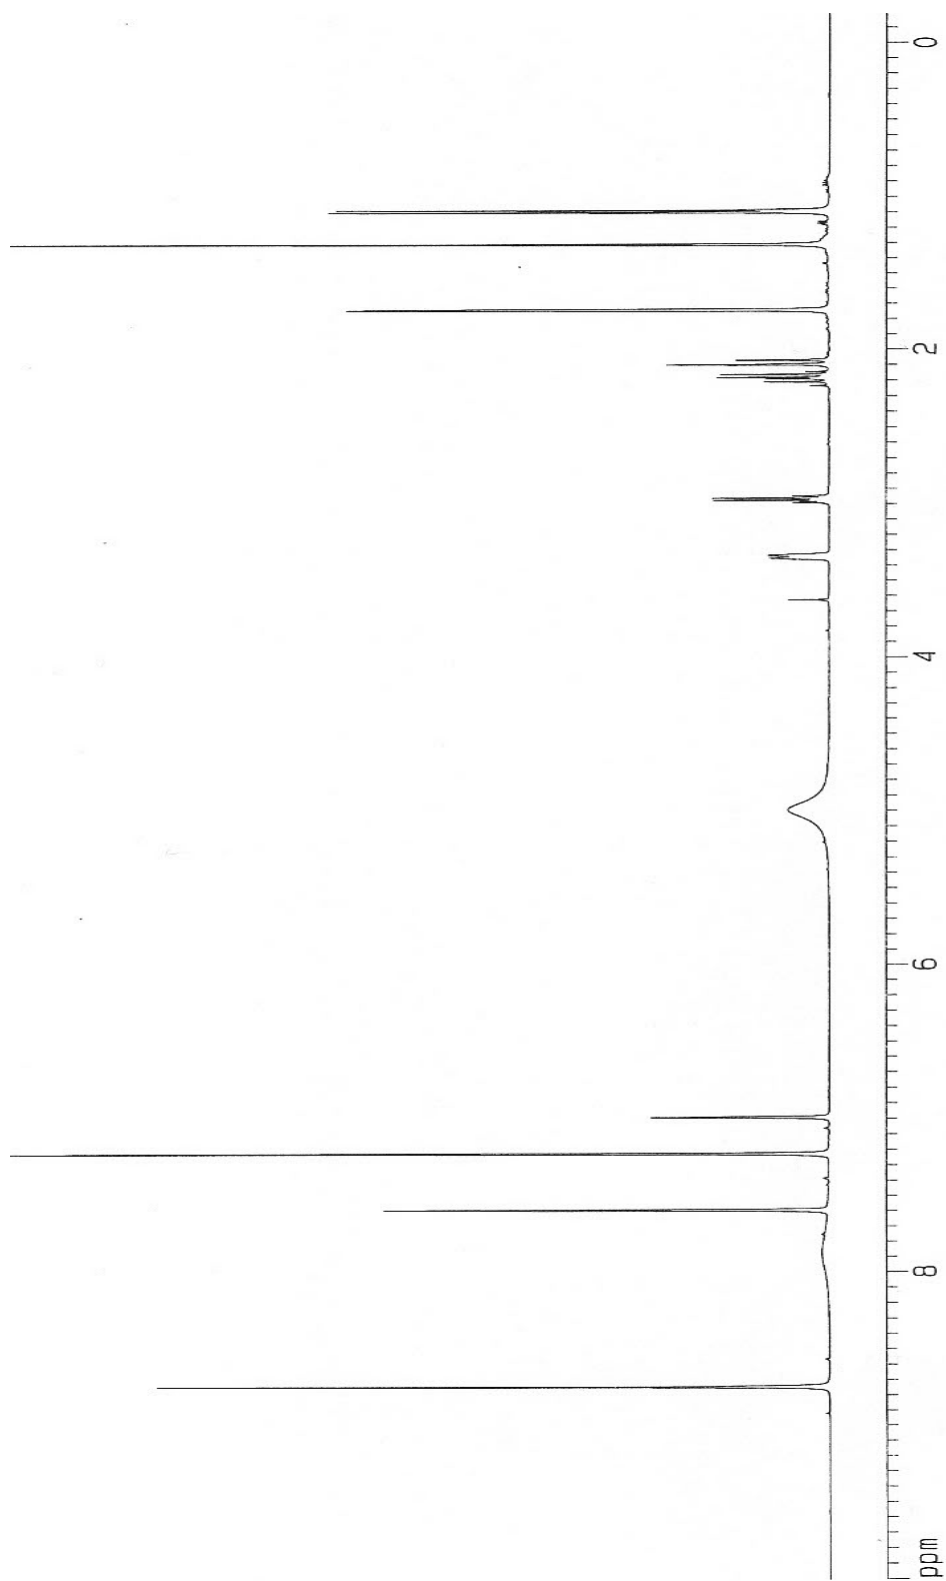

**Figure 1:**  $^1\text{H}$ -NMR (500 MHz,  $\text{Pyridine-}d_5$ ) spectrum of compound **1**

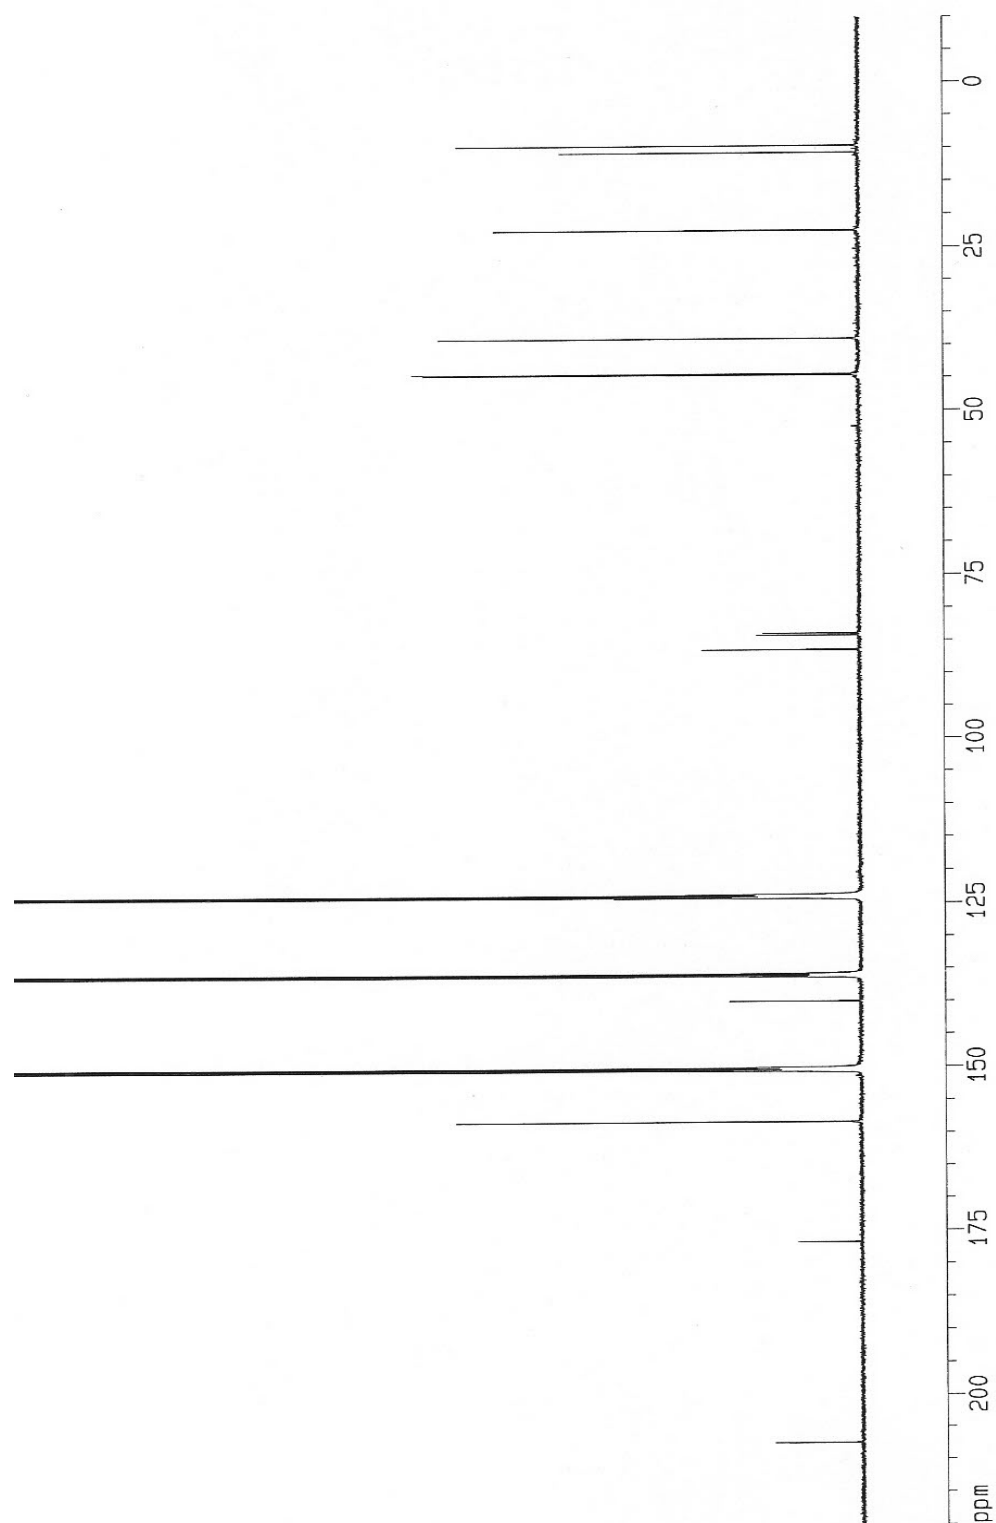

**Figure 2:**  $^{13}\text{C}$ - NMR (500 MHz,  $\text{Pyridine-}d_5$ ) spectrum of compound **1**

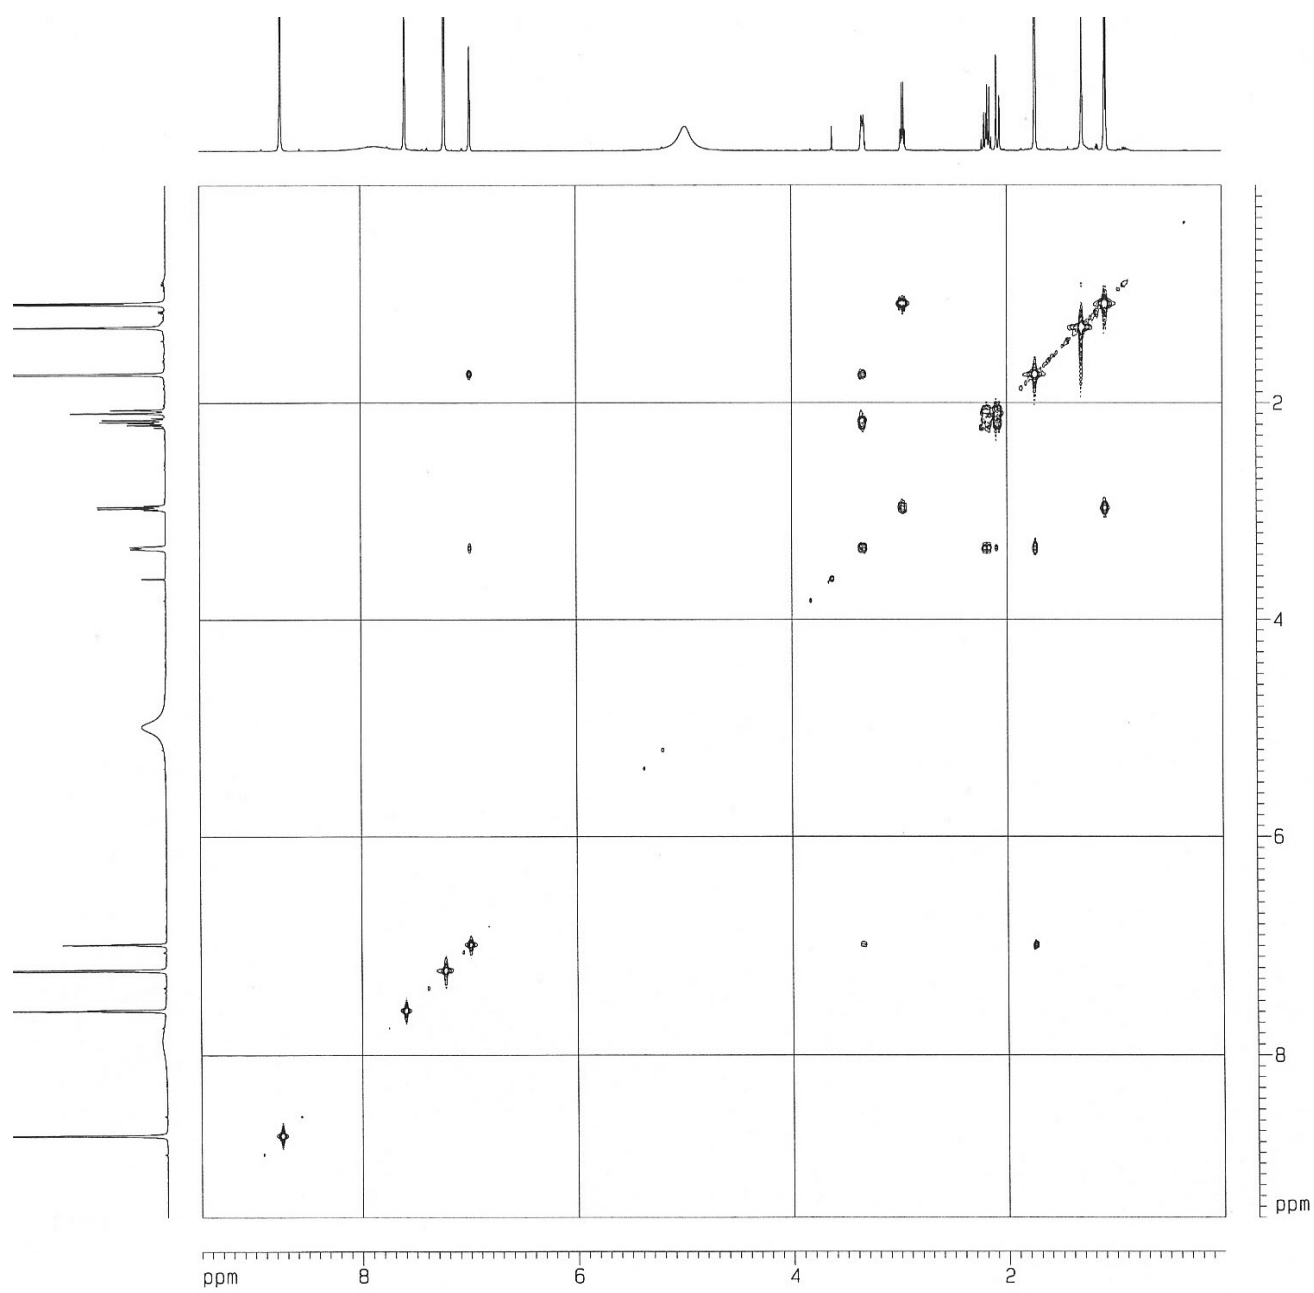

**Figure 3:** COSY spectrum of compound **1**

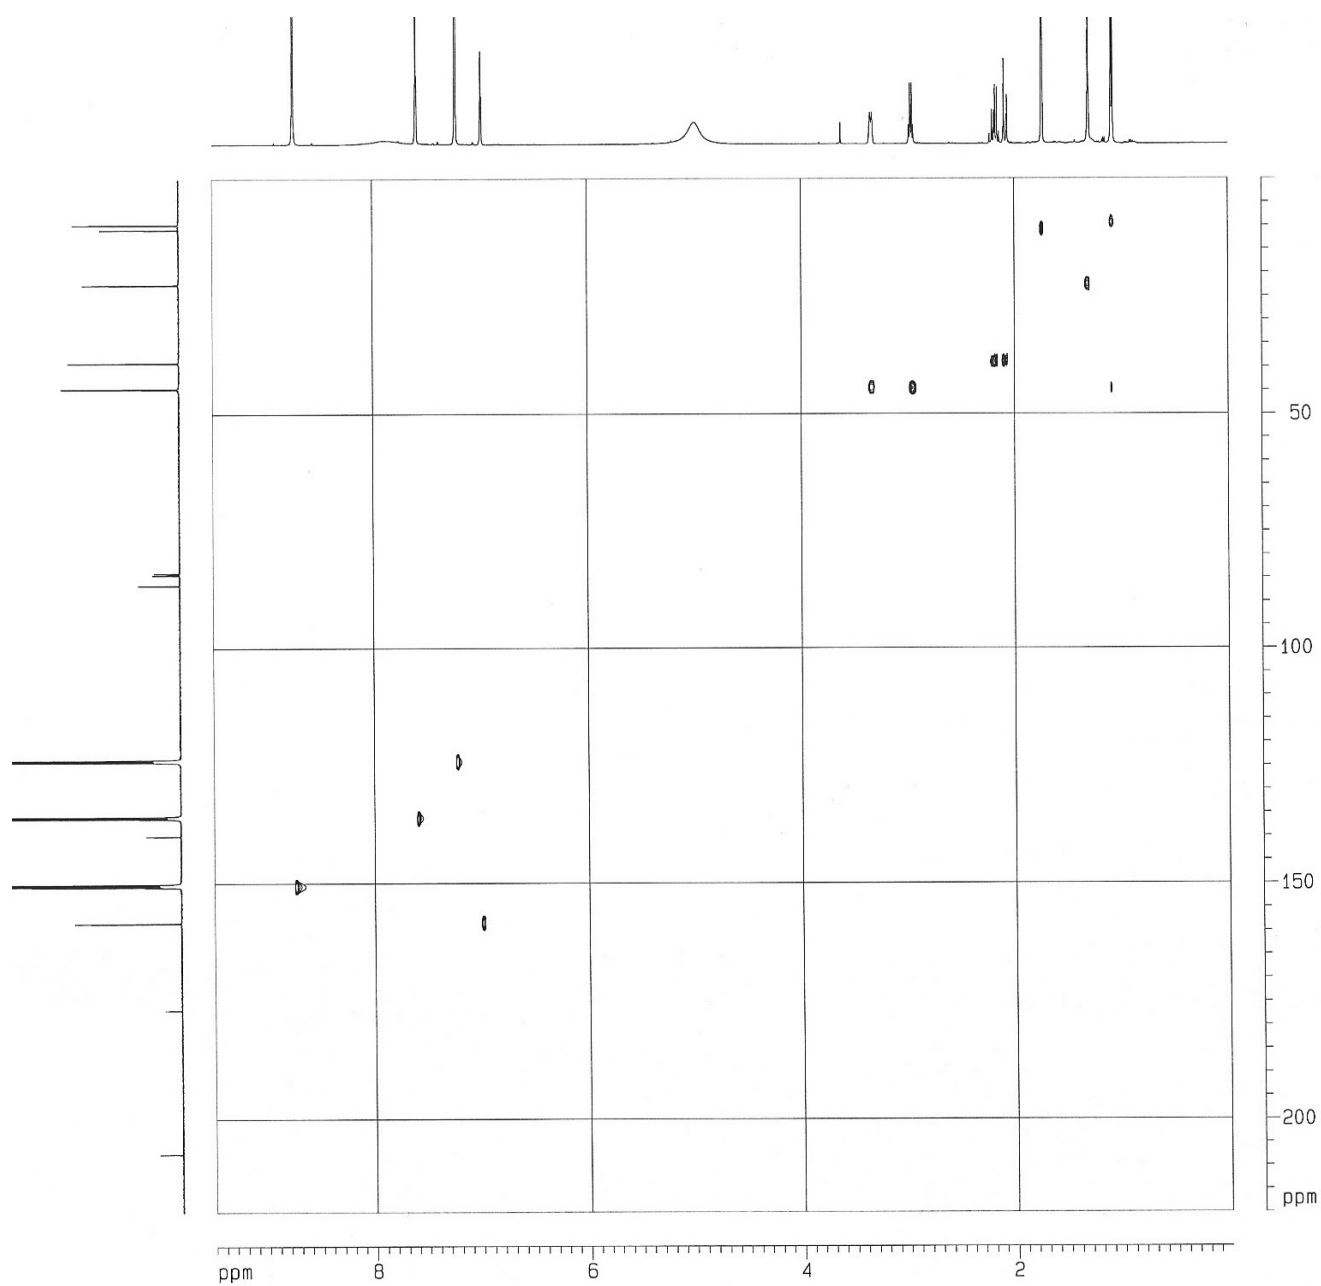

**Figure 4:** HSQC spectrum of compound **1**

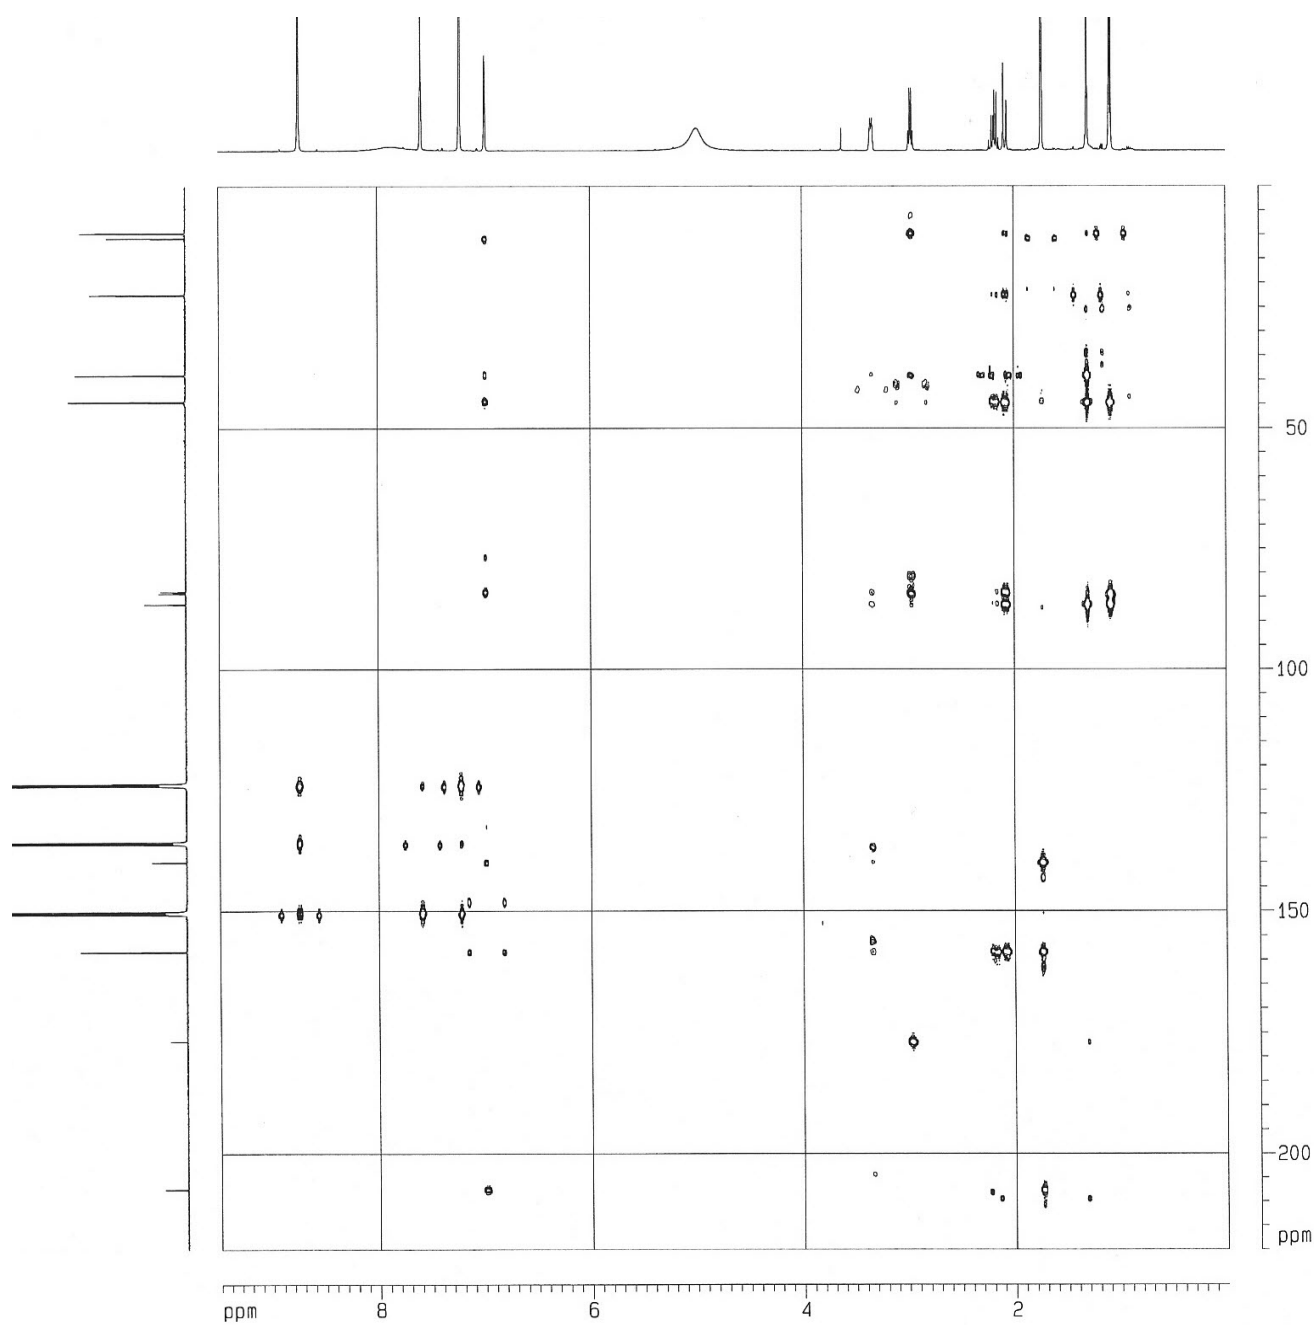

**Figure 5:** HMBC spectrum of compound **1**

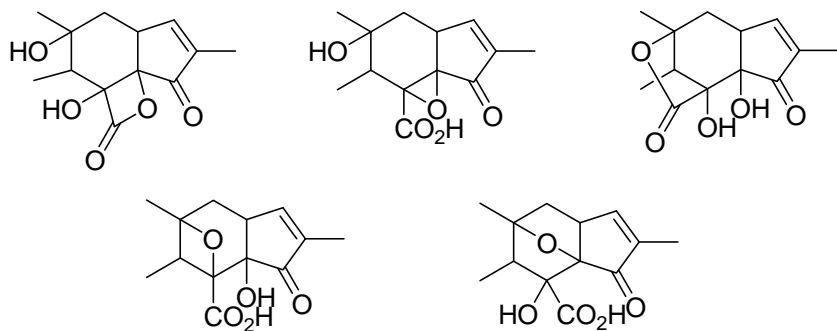

**Figure 6.** Five possible structures of compound **1**.

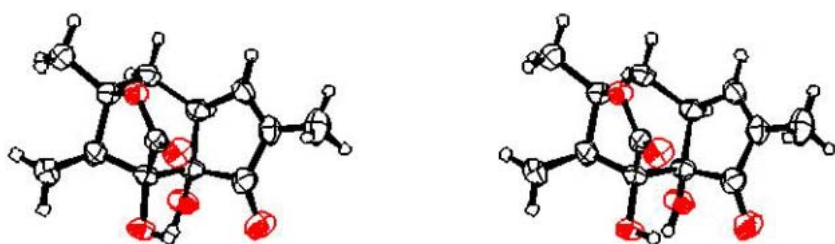

**Figure 7.** A stereo ORTEP drawing of crystal structure of compound **1**

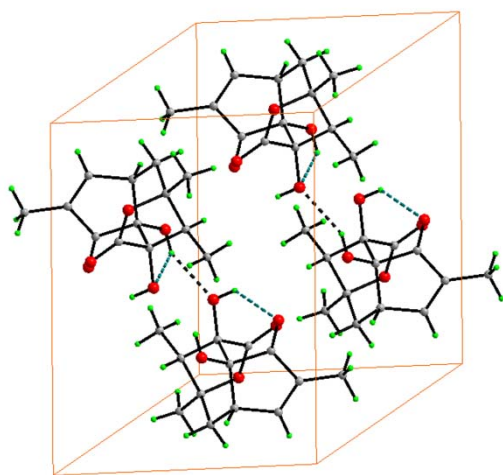

**Figure 8.** A packing pattern with H-bonds of crystal structure of compound **1**

## Result of Antioxidant Activity Test

To evaluate the effects of compound **1** on the antioxidant activity, the DPPH free radical scavenging activity was primarily determined. Compound **1** showed a DPPH free radical scavenging activity in a concentration-dependent manner and the IC<sub>50</sub> value was 2.1 mM (Fig. 3). In the same experimental condition, the IC<sub>50</sub> value of ascorbic acid (vitamin C), a positive control, was 3.7 μM. This result suggests that the antioxidant potential with DPPH free radical scavenging activity of **1** was a relatively moderate.

To further confirm whether the antioxidant activity by **1** was associated with the protection of oxidative stress-induced cell death, cell viability assay was performed in hydrogen peroxide (H<sub>2</sub>O<sub>2</sub>)-treated human keratinocyte HaCaT cell culture systems. As illustrated in Figure 4, cell viability was clearly decreased by exposure of 1 mM of H<sub>2</sub>O<sub>2</sub> with 56% compared to control incubation. However, the treatment of various concentrations of **1** (0-25 μM) protected the cell death induced by H<sub>2</sub>O<sub>2</sub> in a concentration-dependent manner. The data were coincided with the results of antioxidant activity of **1** in a DPPH free radical scavenging activity.

| Concentration (mM) | % of Control |
|--------------------|--------------|
| 0.008              | 68.400       |
| 0.04               | 66.952       |
| 0.2                | 64.779       |
| 1                  | 52.666       |
| 5                  | 29.888       |

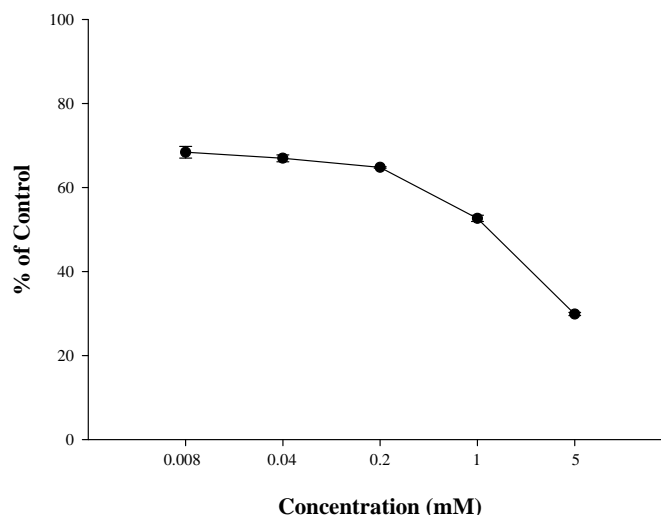

**Figure 9.** Antioxidant potential of **1** on DPPH free radical scavenging activity.

DPPH free radical scavenging activity was measured by incubation with DPPH (300  $\mu$ M) and test samples at 37°C for 30 min. % Control was determined by the comparison with solvent-treated control incubations.

| Concentration ( $\mu$ M) | Viability (%) |
|--------------------------|---------------|
| 0                        | 56.132        |
| 12.5                     | 58.161        |
| 25                       | 71.190        |

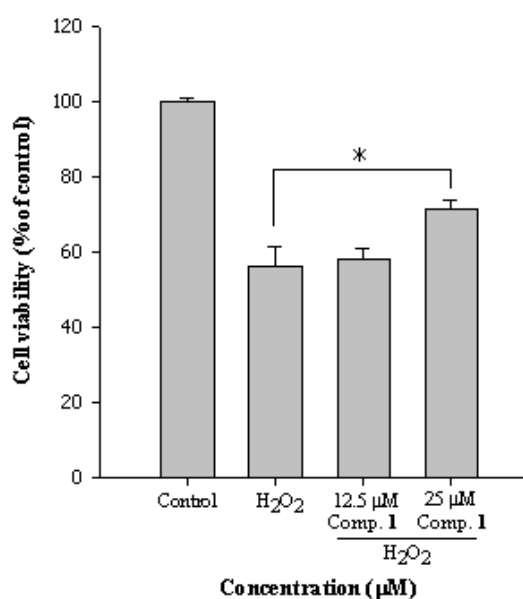

**Figure 10.** Protective effects of **1** on H<sub>2</sub>O<sub>2</sub>-induced cell death of HaCaT human keratinocytes. Human keratinocyte cells (HaCaT) were plated at a density of 8,000 cells in 96-well plates in RPMI supplemented with 10% FBS, and incubated for 24 h. After pretreatment of **1** for 1 h, the cells were exposed with H<sub>2</sub>O<sub>2</sub> (1 mM) for 1 h, and then fresh medium was added, and incubated for an additional 24 h. The values of % of cell survival were calculated by the mean absorbance of samples treated cells/absorbance of control cells. Data are represented as the means  $\pm$  S.E. ( $n = 3$ ) (\* $p < 0.05$  indicates statistically significant differences from the control group).
